# Supplementary material
Source: PubMed Central journal article supplement (PMC3368679)
Supplement: cn100048z_si_001.pdf [file cn100048z_si_001.pdf]

## Supporting Information

### Isolation of Functional Presynaptic Complexes from CNS Neurons: A Cell-Free Preparation for the Study of Presynaptic Compartments *In Vitro*

Anna Lisa Lucido<sup>†,1,3</sup> Gopakumar Gopalakrishnan<sup>†,1,2,3,4</sup> Patricia T. Yam,<sup>1,3</sup> David R. Colman<sup>\*1,3</sup> and R. Bruce Lennox<sup>\*2,3,4</sup>

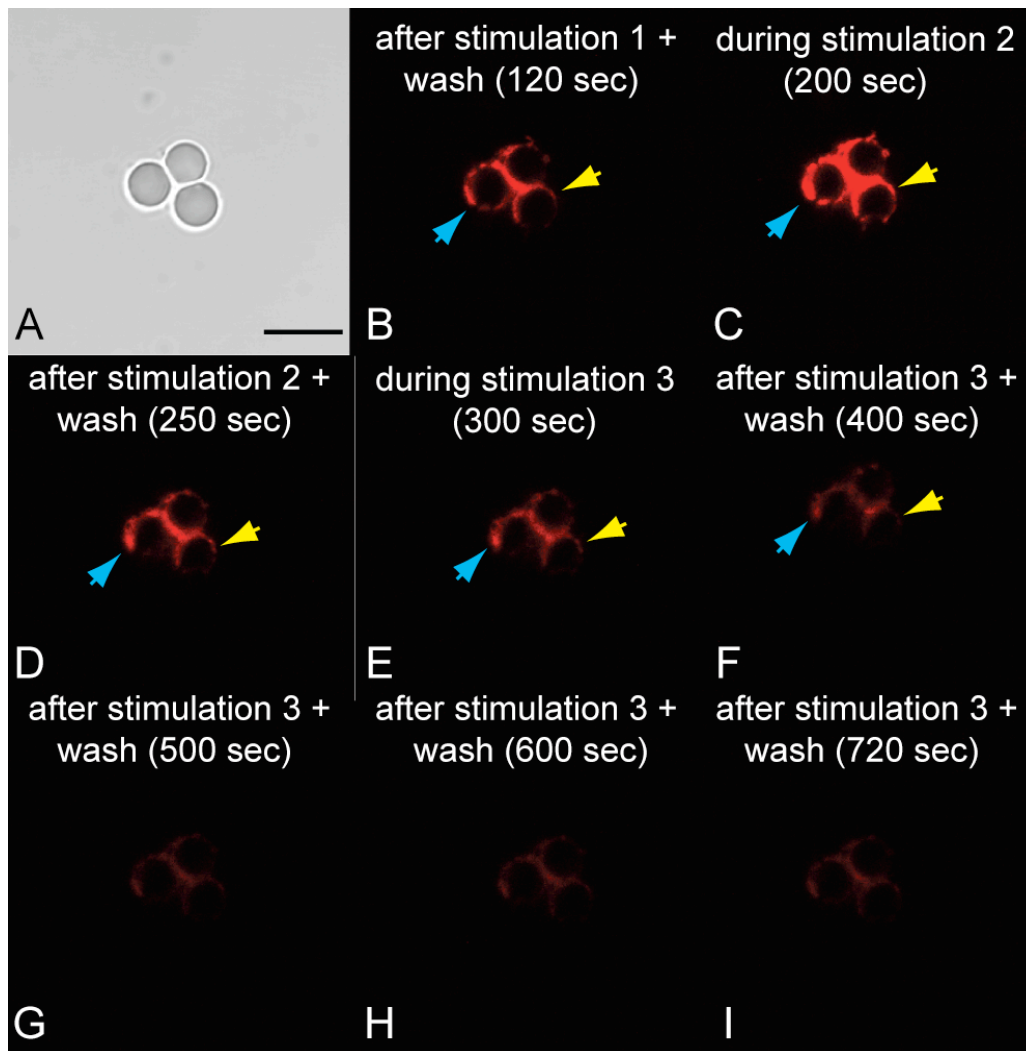

S.I.1. Figure depicting time-lapse images from the SV recycling experiment. Different stimulation steps and their corresponding time is indicated. Image panel C corresponds to a second stimulation using FM 4-64 dye in the presence of  $\text{Ca}^{2+}$  that resulted in the further uptake of the dye during SV endocytosis. The last image panels (G-I) clearly show that there is very little photobleaching occurred and the decrease in fluorescence intensity observed (panels E and F) is clearly due to the SV exocytosis.

S.I.2. Consult the web-enhanced object (WEO) files included in the manuscript showing the FM 4-64 dye uptake and release. The first movie shows dye uptake as well as washing steps and the second movie shows the dye release and the following washing steps.
